# Supplementary material for: Beneficial Effect of Heat-Killed Lactic Acid Bacterium Lactobacillus johnsonii No. 1088 on Temporal Gastroesophageal Reflux-Related Symptoms in Healthy Volunteers: A Randomized, Placebo-Controlled, Double-Blind, Parallel-Group Study
Source: MDPI journal article supplement (doi:10.3390/nu16081230), 2024-04-20
Supplement: s1 [file s1]

**Table S1. Baseline characteristics of participants (Blood test and urinalysis)(full analysis set)**

| Items                                                |                       | Placebo group<br>(n = 60) | LJ88 group<br>(n = 60) | p-value | (method) <sup>1)</sup> | All participants<br>(n = 120) |
|------------------------------------------------------|-----------------------|---------------------------|------------------------|---------|------------------------|-------------------------------|
| White blood cell count (/μL)                         |                       | 5283 ± 1315               | 5697 ± 1561            | 0.119   | (Student's t-test)     | 5490 ± 1452                   |
| Number of red blood cells (×10 <sup>4</sup> /μL)     |                       | 450.8 ± 53.2              | 456.4 ± 46.5           | 0.543   |                        | 453.6 ± 49.9                  |
| Hemoglobin (g/dL)                                    |                       | 13.7 ± 1.5                | 13.7 ± 1.1             | 0.939   |                        | 13.7 ± 1.3                    |
| Hematocrit (%)                                       |                       | 43.0 ± 4.0                | 43.5 ± 3.4             | 0.476   |                        | 43.3 ± 3.7                    |
| Platelet count (×10 <sup>4</sup> /μL)                |                       | 25.9 ± 6.2                | 25.8 ± 5.6             | 0.930   |                        | 25.8 ± 5.9                    |
| Mean Corpuscular Volume (MCV) (fL)                   |                       | 95.8 ± 5.3                | 95.7 ± 4.7             | 0.884   |                        | 95.8 ± 5.0                    |
| Mean Corpuscular Hemoglobin(MCH) (pg)                |                       | 30.4 ± 1.8                | 30.1 ± 1.6             | 0.290   |                        | 30.3 ± 1.7                    |
| Mean Corpuscular Hemoglobin Concentration (MCHC) (%) |                       | 31.8 ± 0.9                | 31.5 ± 1.0             | 0.119   |                        | 31.6 ± 1.0                    |
| Neutrophils/white blood cell image (%)               |                       | 56.5 ± 6.9                | 57.1 ± 8.1             | 0.693   |                        | 56.8 ± 7.5                    |
| Lymphocytes/white blood cell image (%)               |                       | 33.6 ± 6.2                | 33.6 ± 7.5             | 0.976   |                        | 33.6 ± 6.8                    |
| Monocytes/white blood cell image (%)                 |                       | 5.9 ± 1.6                 | 5.6 ± 1.3              | 0.217   |                        | 5.7 ± 1.5                     |
| Eosinophils/white blood cell image (%)               |                       | 3.1 ± 2.1                 | 3.0 ± 2.0              | 0.696   |                        | 3.0 ± 2.1                     |
| Basophils/white blood cell image (%)                 |                       | 0.9 ± 0.4                 | 0.8 ± 0.4              | 0.718   |                        | 0.8 ± 0.4                     |
| Total protein (g/dL)                                 |                       | 7.0 ± 0.4                 | 7.0 ± 0.4              | 0.796   |                        | 7.0 ± 0.4                     |
| Albumin (g/dL)                                       |                       | 4.4 ± 0.3                 | 4.4 ± 0.3              | 0.793   |                        | 4.4 ± 0.3                     |
| Aspartate aminotransferase (AST) (U/L)               |                       | 20.2 ± 4.4                | 20.2 ± 6.5             | 0.935   |                        | 20.2 ± 5.5                    |
| Alanine aminotransferase (ALT) (U/L)                 |                       | 17.1 ± 8.2                | 16.9 ± 7.8             | 0.882   |                        | 17.0 ± 8.0                    |
| Lactate dehydrogenase (IFCC) (U/L)                   |                       | 173.7 ± 24.4              | 172.1 ± 24.2           | 0.711   |                        | 172.9 ± 24.2                  |
| Total bilirubin (mg/dL)                              |                       | 0.9 ± 0.3                 | 0.8 ± 0.3              | 0.367   |                        | 0.9 ± 0.3                     |
| Alkaline phosphatase (IFCC) (U/L)                    |                       | 60.9 ± 17.4               | 64.2 ± 17.1            | 0.295   |                        | 62.5 ± 17.3                   |
| γ-Glutamyltransferase (U/L)                          |                       | 24.9 ± 15.2               | 21.8 ± 14.9            | 0.270   |                        | 23.4 ± 15.1                   |
| Urea nitrogen (UN) (mg/dL)                           |                       | 13.1 ± 4.1                | 13.1 ± 3.5             | 0.960   |                        | 13.1 ± 3.8                    |
| Creatinine (mg/dL)                                   |                       | 0.77 ± 0.17               | 0.75 ± 0.14            | 0.584   |                        | 0.76 ± 0.16                   |
| Uric acid (UA) (mg/dL)                               |                       | 5.1 ± 1.3                 | 5.3 ± 1.3              | 0.558   |                        | 5.2 ± 1.3                     |
| Sodium (Na) (mEq/L)                                  |                       | 140.2 ± 1.8               | 140.3 ± 1.6            | 0.831   |                        | 140.2 ± 1.7                   |
| Chlorine (Cl) (mEq/L)                                |                       | 103.2 ± 1.7               | 103.3 ± 1.7            | 0.915   |                        | 103.2 ± 1.7                   |
| Potassium (K) mEq/L)                                 |                       | 4.1 ± 0.3                 | 4.1 ± 0.3              | 0.491   |                        | 4.1 ± 0.3                     |
| Calcium (Ca) (mg/dL)                                 |                       | 9.3 ± 0.3                 | 9.4 ± 0.3              | 0.574   |                        | 9.4 ± 0.3                     |
| Total cholesterol (mg/dL)                            |                       | 195.3 ± 26.3              | 199.8 ± 32.7           | 0.411   |                        | 197.5 ± 29.6                  |
| LDL-cholesterol (mg/dL)                              |                       | 113.2 ± 27.2              | 115.7 ± 27.0           | 0.612   |                        | 114.5 ± 27.0                  |
| HDL-cholesterol (mg/dL)                              |                       | 67.8 ± 16.3               | 70.8 ± 20.2            | 0.370   |                        | 69.3 ± 18.3                   |
| TG (neutral fat) (mg/dL)                             |                       | 81.3 ± 42.8               | 81.2 ± 42.9            | 0.981   |                        | 81.2 ± 42.7                   |
| Glucose (mg/dL)                                      |                       | 84.9 ± 6.8                | 85.3 ± 7.9             | 0.766   |                        | 85.1 ± 7.3                    |
| HbA1c(NGSP) (%)                                      |                       | 5.3 ± 0.3                 | 5.4 ± 0.2              | 0.096   |                        | 5.4 ± 0.2                     |
| urine pH                                             |                       | 6.18 ± 0.51               | 6.24 ± 0.65            | 0.535   |                        | 6.21 ± 0.59                   |
| urine specific gravity                               |                       | 1.018 ± 0.009             | 1.019 ± 0.009          | 0.561   |                        | 1.019 ± 0.009                 |
| Menstruation                                         | Before menopause      | 20                        | 19                     | 1.000   | (Fisher's exact test)  | 39                            |
|                                                      | Merginal (2 times/mt) | 0                         | 1                      |         |                        | 1                             |
|                                                      | After menopause       | 13                        | 14                     |         |                        | 27                            |
| Urine protein                                        | -                     | 57                        | 57                     | 1.000   |                        | 114                           |
|                                                      | +/-                   | 2                         | 3                      |         |                        | 5                             |
|                                                      | 3+                    | 1                         | 0                      |         |                        | 1                             |
| Urine glucose                                        | -                     | 60                        | 60                     | -       | -                      | 120                           |
| Urine urobilinogen                                   | +/-                   | 60                        | 60                     | -       |                        | 120                           |
| Urine bilirubin                                      | -                     | 60                        | 60                     | -       |                        | 120                           |
| Urine keton body                                     | -                     | 60                        | 60                     | -       |                        | 120                           |
|                                                      | -                     | 55                        | 60                     |         |                        | 115                           |
| Urinary occult<br>blood reaction                     | +/-                   | 1                         | 0                      | 0.057   | (Fisher's exact test)  | 1                             |
|                                                      | +                     | 2                         | 0                      |         |                        | 2                             |
|                                                      | 2+                    | 1                         | 0                      |         |                        | 1                             |
|                                                      | 3+                    | 1                         | 0                      |         |                        | 1                             |

Mean ± SD or number of participants are depicted.

<sup>1)</sup>Methods for statistical analyses
