# Supplementary material for: Beneficial Effect of Heat-Killed Lactic Acid Bacterium Lactobacillus johnsonii No. 1088 on Temporal Gastroesophageal Reflux-Related Symptoms in Healthy Volunteers: A Randomized, Placebo-Controlled, Double-Blind, Parallel-Group Study
Source: MDPI journal article supplement (doi:10.3390/nu16081230), 2024-04-20
Supplement: s1 [file s1]

**Table S5. Change in urinalysis results (full analysis set)**

| Items                             | Group   | n  | At screening |   |       | n  | 6W    |   |       |                       | (method)                    |
|-----------------------------------|---------|----|--------------|---|-------|----|-------|---|-------|-----------------------|-----------------------------|
|                                   |         |    | mean         | ± | SD    |    | mean  | ± | SD    | p value <sup>1)</sup> |                             |
| Urine pH                          | Placebo | 60 | 6.18         | ± | 0.51  | 60 | 6.18  | ± | 0.54  | 0.922                 | (Student's t-test)          |
|                                   | LJ88    | 60 | 6.24         | ± | 0.65  | 59 | 6.17  | ± | 0.51  | 0.533                 |                             |
| Urine specific gravity            | Placebo | 60 | 1.018        | ± | 0.009 | 60 | 1.017 | ± | 0.007 | 0.176                 | (Student's t-test)          |
|                                   | LJ88    | 60 | 1.019        | ± | 0.009 | 59 | 1.019 | ± | 0.009 | 0.793                 |                             |
| Urine protein (qualitative)*      | Placebo | 60 | 0.10         | ± | 0.54  | 60 | 0.05  | ± | 0.29  | 0.680                 |                             |
|                                   | LJ88    | 60 | 0.05         | ± | 0.22  | 59 | 0.05  | ± | 0.22  | 1.000                 |                             |
| Urine glucose (qualitative)*      | Placebo | 60 | 0.00         | ± | 0.00  | 60 | 0.00  | ± | 0.00  | 1.000                 |                             |
|                                   | LJ88    | 60 | 0.00         | ± | 0.00  | 59 | 0.00  | ± | 0.00  | 1.000                 |                             |
| Urine urobilinogen (qualitative)* | Placebo | 60 | 0.00         | ± | 0.00  | 60 | 0.00  | ± | 0.00  | 1.000                 | (Wilcoxon signed-rank test) |
|                                   | LJ88    | 60 | 0.00         | ± | 0.00  | 59 | 0.00  | ± | 0.00  | 1.000                 |                             |
| Urine bilirubin (qualitative)*    | Placebo | 60 | 0.00         | ± | 0.00  | 60 | 0.00  | ± | 0.00  | 1.000                 | (Wilcoxon signed-rank test) |
|                                   | LJ88    | 60 | 0.00         | ± | 0.00  | 59 | 0.00  | ± | 0.00  | 1.000                 |                             |
| Urine keton body*                 | Placebo | 60 | 0.00         | ± | 0.00  | 60 | 0.00  | ± | 0.00  | 1.000                 |                             |
|                                   | LJ88    | 60 | 0.00         | ± | 0.00  | 59 | 0.00  | ± | 0.00  | 1.000                 |                             |
| Urinary occult blood reation*     | Placebo | 60 | 0.20         | ± | 0.73  | 60 | 0.17  | ± | 0.69  | 0.596                 |                             |
|                                   | LJ88    | 60 | 0.00         | ± | 0.00  | 59 | 0.29  | ± | 0.87  | 0.016                 |                             |

<sup>1)</sup>Qualitative data were scored and used for analyses.
