# Supplementary material for: Beneficial Effect of Heat-Killed Lactic Acid Bacterium Lactobacillus johnsonii No. 1088 on Temporal Gastroesophageal Reflux-Related Symptoms in Healthy Volunteers: A Randomized, Placebo-Controlled, Double-Blind, Parallel-Group Study
Source: MDPI journal article supplement (doi:10.3390/nu16081230), 2024-04-20
Supplement: s1 [file s1]

**Table S2. Change in body weight, BMI, blood pressures, and pulse rate (full analysis set)**

| Parameter                       | Group   | n  | 0W    |   |      | n  | 3W    |   |      |                       | n  | 6W    |   |      |                       |
|---------------------------------|---------|----|-------|---|------|----|-------|---|------|-----------------------|----|-------|---|------|-----------------------|
|                                 |         |    | mean  | ± | SD   |    | mean  | ± | SD   | p value <sup>1)</sup> |    | mean  | ± | SD   | p value <sup>1)</sup> |
| Body weight (kg)                | Placebo | 60 | 60.8  | ± | 11.7 | 60 | 61.1  | ± | 11.6 | 0.002                 | 60 | 61.0  | ± | 11.6 | 0.100                 |
|                                 | LJ88    | 60 | 60.4  | ± | 11.5 | 60 | 60.5  | ± | 11.3 | 0.933                 | 59 | 60.3  | ± | 11.3 | 0.580                 |
| BMI                             | Placebo | 60 | 22.3  | ± | 3.2  | 60 | 22.4  | ± | 3.1  | 0.001                 | 60 | 22.4  | ± | 3.1  | 0.063                 |
|                                 | LJ88    | 60 | 22.2  | ± | 3.2  | 60 | 22.2  | ± | 3.2  | 0.922                 | 59 | 22.1  | ± | 3.2  | 0.515                 |
| Systolic blood pressure (mmHg)  | Placebo | 60 | 125.4 | ± | 15.8 | 60 | 122.3 | ± | 14.3 | 0.067                 | 60 | 125.7 | ± | 14.6 | 0.984                 |
|                                 | LJ88    | 60 | 120.0 | ± | 14.5 | 60 | 118.9 | ± | 13.0 | 0.610                 | 59 | 122.0 | ± | 14.0 | 0.234                 |
| Diastolic blood pressure (mmHg) | Placebo | 60 | 79.9  | ± | 12.5 | 60 | 76.0  | ± | 13.1 | 0.000                 | 60 | 80.6  | ± | 12.8 | 0.706                 |
|                                 | LJ88    | 60 | 76.7  | ± | 11.2 | 60 | 73.2  | ± | 9.6  | 0.002                 | 59 | 76.7  | ± | 9.3  | 0.999                 |
| Pulse rate (bpm)                | Placebo | 60 | 75.3  | ± | 9.5  | 60 | 74.2  | ± | 9.6  | 0.555                 | 60 | 76.2  | ± | 9.0  | 0.650                 |
|                                 | LJ88    | 60 | 76.2  | ± | 11.2 | 60 | 74.3  | ± | 10.1 | 0.218                 | 59 | 77.0  | ± | 12.2 | 0.690                 |

<sup>1)</sup>Dunnet test (vs. 0W).
