# Supplementary material for: Beneficial Effect of Heat-Killed Lactic Acid Bacterium Lactobacillus johnsonii No. 1088 on Temporal Gastroesophageal Reflux-Related Symptoms in Healthy Volunteers: A Randomized, Placebo-Controlled, Double-Blind, Parallel-Group Study
Source: MDPI journal article supplement (doi:10.3390/nu16081230), 2024-04-20
Supplement: s1 [file s1]

**Table S3. Blood biochemical test values (full analysis set)**

| Items                                  | Group   | n  | At screening |   |      | n  | 6W    |   |      |                       |
|----------------------------------------|---------|----|--------------|---|------|----|-------|---|------|-----------------------|
|                                        |         |    | mean         | ± | SD   |    | mean  | ± | SD   | p value <sup>1)</sup> |
| Aspartate aminotransferase (AST) (U/L) | Placebo | 60 | 20.2         | ± | 4.4  | 60 | 19.9  | ± | 4.0  | 0.704                 |
|                                        | LJ88    | 60 | 20.2         | ± | 6.5  | 59 | 20.8  | ± | 6.7  | 0.467                 |
| Alanine aminotransferase (ALT) (U/L)   | Placebo | 60 | 17.1         | ± | 8.2  | 60 | 18.0  | ± | 8.2  | 0.311                 |
|                                        | LJ88    | 60 | 16.9         | ± | 7.8  | 59 | 18.7  | ± | 9.3  | 0.020                 |
| Lactate dehydrogenase (IFCC) (U/L)     | Placebo | 60 | 173.7        | ± | 24.4 | 60 | 187.6 | ± | 27.3 | 0.000                 |
|                                        | LJ88    | 60 | 172.1        | ± | 24.2 | 59 | 182.9 | ± | 28.7 | 0.000                 |
| Total bilirubin (mg/dL)                | Placebo | 60 | 0.9          | ± | 0.3  | 60 | 0.8   | ± | 0.2  | 0.045                 |
|                                        | LJ88    | 60 | 0.8          | ± | 0.3  | 59 | 0.8   | ± | 0.3  | 0.088                 |
| Alkaline phosphatase (IFCC) (U/L)      | Placebo | 60 | 60.9         | ± | 17.4 | 60 | 64.7  | ± | 17.7 | 0.000                 |
|                                        | LJ88    | 60 | 64.2         | ± | 17.1 | 59 | 68.6  | ± | 20.0 | 0.000                 |
| γ-Glutamyltransferase (U/L)            | Placebo | 60 | 24.9         | ± | 15.2 | 60 | 25.0  | ± | 15.3 | 0.921                 |
|                                        | LJ88    | 60 | 21.8         | ± | 14.9 | 59 | 21.8  | ± | 14.4 | 0.597                 |
| Glucose (mg/dL)                        | Placebo | 60 | 84.9         | ± | 6.8  | 60 | 85.6  | ± | 8.3  | 0.416                 |
|                                        | LJ88    | 60 | 85.3         | ± | 7.9  | 59 | 82.7  | ± | 8.1  | 0.036                 |
| HbA1c(NGSP) (%)                        | Placebo | 60 | 5.3          | ± | 0.3  | 60 | 5.4   | ± | 0.3  | 0.000                 |
|                                        | LJ88    | 60 | 5.4          | ± | 0.2  | 59 | 5.5   | ± | 0.2  | 0.000                 |
| Total cholesterol (mg/dL)              | Placebo | 60 | 195.3        | ± | 26.3 | 60 | 207.4 | ± | 30.3 | 0.000                 |
|                                        | LJ88    | 60 | 199.8        | ± | 32.7 | 59 | 208.1 | ± | 33.6 | 0.002                 |
| LDL-cholesterol (mg/dL)                | Placebo | 60 | 113.2        | ± | 27.2 | 60 | 120.1 | ± | 29.0 | 0.003                 |
|                                        | LJ88    | 60 | 115.7        | ± | 27.0 | 59 | 119.2 | ± | 27.8 | 0.076                 |
| HDL-cholesterol (mg/dL)                | Placebo | 60 | 67.8         | ± | 16.3 | 60 | 70.3  | ± | 19.2 | 0.015                 |
|                                        | LJ88    | 60 | 70.8         | ± | 20.2 | 59 | 71.8  | ± | 19.9 | 0.496                 |
| TG (neutral fat) (mg/dL)               | Placebo | 60 | 81.3         | ± | 42.8 | 60 | 86.4  | ± | 57.8 | 0.355                 |
|                                        | LJ88    | 60 | 81.2         | ± | 42.9 | 59 | 90.7  | ± | 50.1 | 0.090                 |
| Total protein (g/dL)                   | Placebo | 60 | 7.0          | ± | 0.4  | 60 | 7.3   | ± | 0.4  | 0.000                 |
|                                        | LJ88    | 60 | 7.0          | ± | 0.4  | 59 | 7.2   | ± | 0.3  | 0.000                 |
| Albumin (g/dL)                         | Placebo | 60 | 4.4          | ± | 0.3  | 60 | 4.4   | ± | 0.2  | 0.365                 |
|                                        | LJ88    | 60 | 4.4          | ± | 0.3  | 59 | 4.4   | ± | 0.3  | 0.348                 |
| Urea nitrogen (UN) (mg/dL)             | Placebo | 60 | 13.1         | ± | 4.1  | 60 | 12.5  | ± | 3.4  | 0.106                 |
|                                        | LJ88    | 60 | 13.1         | ± | 3.5  | 59 | 13.0  | ± | 3.5  | 0.589                 |
| Creatinine (mg/dL)                     | Placebo | 60 | 0.8          | ± | 0.2  | 60 | 0.7   | ± | 0.2  | 0.000                 |
|                                        | LJ88    | 60 | 0.8          | ± | 0.1  | 59 | 0.7   | ± | 0.2  | 0.005                 |
| Uric acid (UA) (mg/dL)                 | Placebo | 60 | 5.1          | ± | 1.3  | 60 | 5.0   | ± | 1.2  | 0.186                 |
|                                        | LJ88    | 60 | 5.3          | ± | 1.3  | 59 | 5.2   | ± | 1.3  | 0.366                 |
| Sodium (Na) (mEq/L)                    | Placebo | 60 | 140.2        | ± | 1.8  | 60 | 140.5 | ± | 1.9  | 0.254                 |
|                                        | LJ88    | 60 | 140.3        | ± | 1.6  | 59 | 141.0 | ± | 1.7  | 0.007                 |
| Chlorine (Cl) (mEq/L)                  | Placebo | 60 | 103.2        | ± | 1.7  | 60 | 104.0 | ± | 1.8  | 0.004                 |
|                                        | LJ88    | 60 | 103.3        | ± | 1.7  | 59 | 104.1 | ± | 1.7  | 0.001                 |
| Potassium (K) (mEq/L)                  | Placebo | 60 | 4.1          | ± | 0.3  | 60 | 4.2   | ± | 0.3  | 0.002                 |
|                                        | LJ88    | 60 | 4.1          | ± | 0.3  | 59 | 4.2   | ± | 0.3  | 0.167                 |
| Calcium (Ca) (mg/dL)                   | Placebo | 60 | 9.3          | ± | 0.3  | 60 | 9.4   | ± | 0.3  | 0.103                 |
|                                        | LJ88    | 60 | 9.4          | ± | 0.3  | 59 | 9.4   | ± | 0.3  | 0.825                 |

<sup>1)</sup>Student's t-test (paired)
