# Supplementary material for: Beneficial Effect of Heat-Killed Lactic Acid Bacterium Lactobacillus johnsonii No. 1088 on Temporal Gastroesophageal Reflux-Related Symptoms in Healthy Volunteers: A Randomized, Placebo-Controlled, Double-Blind, Parallel-Group Study
Source: MDPI journal article supplement (doi:10.3390/nu16081230), 2024-04-20
Supplement: s1 [file s1]

**Table S4. Change in blood cellular tests results (full analysis set)**

| Items                                                | Group   | n  | At screening |   |      | n  | 6W    |   |      |                       |
|------------------------------------------------------|---------|----|--------------|---|------|----|-------|---|------|-----------------------|
|                                                      |         |    | mean         | ± | SD   |    | mean  | ± | SD   | p value <sup>1)</sup> |
| White blood cell count (/μL)                         | Placebo | 60 | 5283         | ± | 1315 | 60 | 5510  | ± | 1434 | 0.141                 |
|                                                      | LJ88    | 60 | 5697         | ± | 1561 | 59 | 5592  | ± | 1448 | 0.735                 |
| Number of red blood cells (×10 <sup>4</sup> /μL)     | Placebo | 60 | 450.8        | ± | 53.2 | 60 | 469.0 | ± | 49.6 | 0.000                 |
|                                                      | LJ88    | 60 | 456.4        | ± | 46.5 | 59 | 467.1 | ± | 47.1 | 0.003                 |
| Hemoglobin (g/dL)                                    | Placebo | 60 | 13.7         | ± | 1.5  | 60 | 14.2  | ± | 1.4  | 0.000                 |
|                                                      | LJ88    | 60 | 13.7         | ± | 1.1  | 59 | 14.0  | ± | 1.2  | 0.002                 |
| Hematocrit (%)                                       | Placebo | 60 | 43.0         | ± | 4.0  | 60 | 44.2  | ± | 3.9  | 0.000                 |
|                                                      | LJ88    | 60 | 43.5         | ± | 3.4  | 59 | 43.6  | ± | 3.6  | 0.907                 |
| Platelet count (×10 <sup>4</sup> /μL)                | Placebo | 60 | 25.9         | ± | 6.2  | 60 | 27.1  | ± | 6.1  | 0.004                 |
|                                                      | LJ88    | 60 | 25.8         | ± | 5.6  | 59 | 27.4  | ± | 7.9  | 0.000                 |
| Mean Corpuscular Volume (MCV) (fL)                   | Placebo | 60 | 95.8         | ± | 5.3  | 60 | 94.4  | ± | 4.6  | 0.000                 |
|                                                      | LJ88    | 60 | 95.7         | ± | 4.7  | 59 | 93.5  | ± | 4.4  | 0.000                 |
| Mean Corpuscular Hemoglobin(MCH) (pg)                | Placebo | 60 | 30.4         | ± | 1.8  | 60 | 30.4  | ± | 1.7  | 0.594                 |
|                                                      | LJ88    | 60 | 30.1         | ± | 1.6  | 59 | 30.1  | ± | 1.6  | 0.789                 |
| Mean Corpuscular Hemoglobin Concentration (MCHC) (%) | Placebo | 60 | 31.8         | ± | 0.9  | 60 | 32.2  | ± | 0.9  | 0.001                 |
|                                                      | LJ88    | 60 | 31.5         | ± | 1.0  | 59 | 32.2  | ± | 0.9  | 0.000                 |
| Neutrophils/white blood cell image (%)               | Placebo | 60 | 56.5         | ± | 6.9  | 60 | 58.2  | ± | 8.6  | 0.118                 |
|                                                      | LJ88    | 60 | 57.1         | ± | 8.1  | 59 | 57.0  | ± | 7.5  | 0.891                 |
| Lymphocytes/white blood cell image (%)               | Placebo | 60 | 33.6         | ± | 6.2  | 60 | 32.4  | ± | 7.6  | 0.174                 |
|                                                      | LJ88    | 60 | 33.6         | ± | 7.5  | 59 | 33.4  | ± | 7.0  | 0.698                 |
| Monocytes/white blood cell image (%)                 | Placebo | 60 | 5.9          | ± | 1.6  | 60 | 5.7   | ± | 1.7  | 0.274                 |
|                                                      | LJ88    | 60 | 5.6          | ± | 1.3  | 59 | 5.8   | ± | 1.5  | 0.047                 |
| Eosinophils/white blood cell image (%)               | Placebo | 60 | 3.1          | ± | 2.1  | 60 | 3.0   | ± | 2.1  | 0.448                 |
|                                                      | LJ88    | 60 | 3.0          | ± | 2.0  | 59 | 3.0   | ± | 1.9  | 0.802                 |
| Basophils/white blood cell image (%)                 | Placebo | 60 | 0.9          | ± | 0.4  | 60 | 0.8   | ± | 0.3  | 0.339                 |
|                                                      | LJ88    | 60 | 0.8          | ± | 0.4  | 59 | 0.8   | ± | 0.4  | 0.488                 |

<sup>1)</sup>Studen's t-teat (paired)
